# Supplementary material for: Na3B6O10(HCOO): an ultraviolet nonlinear optical sodium borate-formate
Source: Royal Society of Chemistry journal article supplement (doi:10.1039/d2qi01410f), 2022-01-01
Supplement: d2qi01410f1.pdf [file d2qi01410f1.pdf]

## *Supporting Information*

### **Na<sub>3</sub>B<sub>6</sub>O<sub>10</sub>(HCOO): An Ultraviolet Nonlinear Optical Sodium Borate-Formate**

*Yi-Nan Zhang,<sup>a</sup> Qing-Fen Li,<sup>a</sup> Bing-Ben Chen,<sup>a</sup> You-Zhao Lan,<sup>a</sup> Jian-Wen Cheng,<sup>\*a</sup> and Guo-Yu Yang<sup>\*b</sup>*

*<sup>a</sup>Key Laboratory of the Ministry of Education for Advanced Catalysis Materials, Institute of Physical Chemistry, Zhejiang Normal University, Jinhua, Zhejiang 321004, China. \*E-mail: jwcheng@zjnu.cn.*

*<sup>b</sup>MOE Key Laboratory of Cluster Science, School of Chemistry and Chemical Engineering, Beijing Institute of Technology, Beijing 100081, China. \*E-mail: ygy@bit.edu.cn.*

#### **Experimental Section**

**Table S1.** X-ray crystallographic data for **1**.

**Table S2.** Selected bond lengths (Å) for compound **1**.

**Figure S1.** IR spectra of **1**.

**Figure S2.** The experimental and simulated PXRD patterns of **1**.

**Figure S3.** The asymmetric unit of **1**.

**Figure S4.** View of the linkage of the (B<sub>6</sub>O<sub>13</sub>)<sup>8-</sup> cluster units in **1**.

**Figure S5.** The coordination environments of Na<sup>+</sup> ions.

**Figure S6.** TG curve of compound **1** under air atmosphere (10 °C/min).

**Table S1.** X-ray crystallographic data for **1**.

|                                      |                                                  |
|--------------------------------------|--------------------------------------------------|
| Empirical formula                    | B <sub>6</sub> CHNa <sub>3</sub> O <sub>12</sub> |
| $M_r$                                | 338.85                                           |
| crystal system                       | Orthorhombic                                     |
| space group                          | $P2_12_12_1$                                     |
| $a$ (Å)                              | 7.6375(8)                                        |
| $b$ (Å)                              | 9.9345(9)                                        |
| $c$ (Å)                              | 12.7231(13)                                      |
| $V$ (Å <sup>3</sup> )                | 965.36(17)                                       |
| $Z$                                  | 4                                                |
| $D_c$ (g cm <sup>-3</sup> )          | 2.331                                            |
| $\mu$ (mm <sup>-1</sup> )            | 0.327                                            |
| $F(000)$                             | 664                                              |
| crystal size (mm)                    | 0.25 × 0.20 × 0.12                               |
| index ranges                         | 2.60-27.48                                       |
| GOF                                  | 1.086                                            |
| collected reflns                     | 8227                                             |
| unique reflns ( $R_{int}$ )          | 2193 (0.0630)                                    |
| observed reflns [ $I > 2\sigma(I)$ ] | 1743                                             |
| refined parameters                   | 199                                              |
| Flack parameter                      | 0.8(7)                                           |
| $R_1^a/wR_2^b$ [ $I > 2\sigma(I)$ ]  | 0.0432/ 0.0859                                   |
| $R_1^a/wR_2^b$ (all data)            | 0.0636/ 0.0964                                   |
| largest difference peak/hole         | 0.272 /-0.344                                    |

$$^aR_1 = \frac{\sum ||F_o| - |F_c||}{\sum |F_o|}, \quad ^b wR_2 = \left\{ \frac{\sum [w(F_o^2 - F_c^2)^2]}{\sum [w(F_o^2)^2]} \right\}^{1/2}.$$

**Table S2.** Selected bond lengths (Å) for compound **1**<sup>a</sup>.

| Bond         | Distance (Å) | Bond        | Distance (Å) |
|--------------|--------------|-------------|--------------|
| Na(1)-O(11)  | 2.313(4)     | B(1)-O(2)   | 1.378(4)     |
| Na(1)-O(2A)  | 2.335(3)     | B(2)-O(4)   | 1.451(4)     |
| Na(1)-O(3B)  | 2.389(3)     | B(2)-O(5)   | 1.454(4)     |
| Na(1)-O(8C)  | 2.506(2)     | B(2)-O(2)   | 1.458(4)     |
| Na(1)-O(9)   | 2.586(3)     | B(2)-O(6)   | 1.510(4)     |
| Na(1)-O(10)  | 2.800(3)     | B(3)-O(10I) | 1.429(4)     |
| Na(2)-O(12D) | 2.335(3)     | B(3)-O(7)   | 1.446(4)     |
| Na(2)-O(5B)  | 2.406(3)     | B(3)-O(3)   | 1.471(4)     |
| Na(2)-O(10)  | 2.411(3)     | B(3)-O(6)   | 1.517(4)     |
| Na(2)-O(7)   | 2.518(2)     | B(4)-O(5J)  | 1.349(4)     |
| Na(2)-O(4E)  | 2.755(3)     | B(4)-O(8)   | 1.366(4)     |
| Na(2)-O(1F)  | 2.845(3)     | B(4)-O(4)   | 1.373(4)     |
| Na(3)-O(7G)  | 2.440(3)     | B(5)-O(1A)  | 1.443(4)     |
| Na(3)-O(2)   | 2.448(3)     | B(5)-O(9)   | 1.455(4)     |
| Na(3)-O(12B) | 2.466(3)     | B(5)-O(8)   | 1.463(4)     |
| Na(3)-O(3G)  | 2.488(3)     | B(5)-O(6)   | 1.529(3)     |
| Na(3)-O(11H) | 2.544(4)     | B(6)-O(10)  | 1.352(4)     |
| Na(3)-O(4)   | 2.553(3)     | B(6)-O(9)   | 1.366(4)     |
| Na(3)-O(12H) | 2.774(3)     | B(6)-O(7)   | 1.374(4)     |
| B(1)-O(1)    | 1.352(3)     | C-O(12)     | 1.214(4)     |
| B(1)-O(3)    | 1.367(4)     | C-O(11)     | 1.237(5)     |

<sup>a</sup> Symmetry codes: A:  $-x + 1/2, -y + 1, z - 1/2$ ; B:  $x - 1/2, -y + 1/2, -z + 1$ ; C:  $-x, y - 1/2, -z + 1/2$ ; D:  $-x + 1/2, -y, z + 1/2$ ; E:  $x, y - 1, z$ ; F:  $-x, y - 1/2, -z + 3/2$ ; G:  $-x, y + 1/2, -z + 3/2$ ; H:  $-x + 1/2, -y + 1, z + 1/2$ ; I:  $x + 1/2, -y + 1/2, -z + 1$ ; J:  $x - 1/2, -y + 3/2, -z + 1$ .

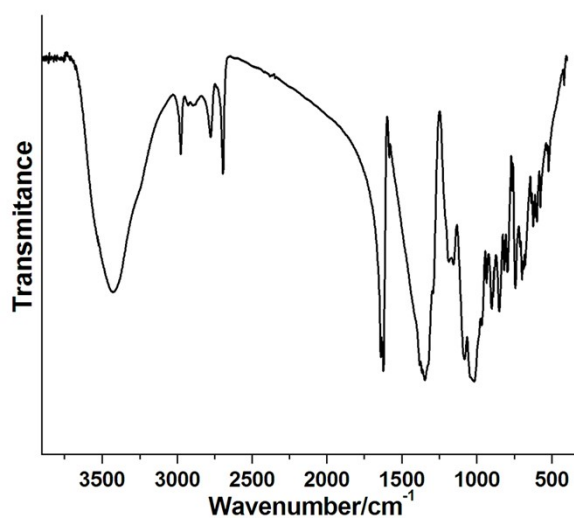**Figure S1.** IR spectra of **1**.

In the IR spectra of **1**, the strong band around  $1626\text{ cm}^{-1}$  is corresponding to the stretching vibrations of the  $\text{COO}^-$ . The characteristic bands around  $1349\text{ cm}^{-1}$  are due to B–O asymmetric stretching of  $\text{BO}_3$

units and the asymmetrical stretching of carboxylate groups. The bands around  $1022\text{ cm}^{-1}$  are associated with  $\text{BO}_4$  units. Since the deformation vibration of  $\text{COO}^-$  and the bending vibrations of the  $\text{BO}_3$  group overlap in the low frequency vibrations, it is difficult to clearly distinguish the weak absorption bands at  $851/744/694/524\text{ cm}^{-1}$ . These assignments are similar to the reported results.<sup>1-2</sup>

(1) F. He, Q. Wang, M. Liu, L. Huang, D. Gao, J. Bi and G. Zou, Hydrogen Bonding Assisted Construction of Graphite-like Deep-UV Optical Materials with Two Types of Parallel  $\pi$ -Conjugated Units, *Cryst. Growth Des.*, 2018, **18**, 4756–4765.

(2) Y. Guo, D. Zhang, T. Zheng, L. Huang, D. Gao, J. Bi and G. Zou, Noncentrosymmetric  $\text{Rb}_3(\text{COOH})_3(\text{H}_3\text{BO}_3)_2$  vs Centrosymmetric  $\text{Cs}_3(\text{COOH})_3(\text{H}_3\text{BO}_3)_2$ , *Cryst. Growth Des.*, 2021, **21**, 5976–5982.

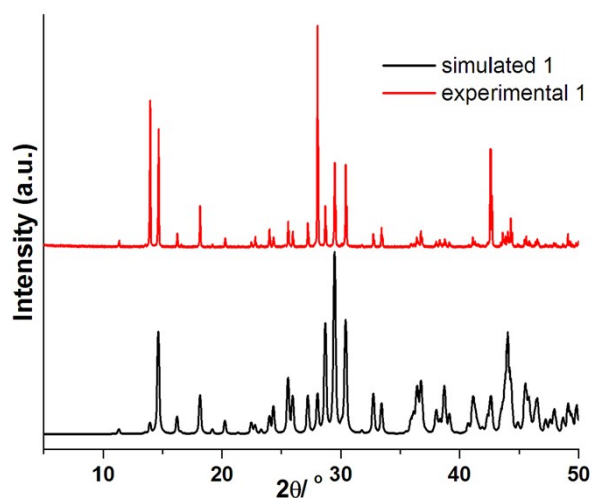

**Figure S2.** The experimental and simulated PXRD patterns of **1**.

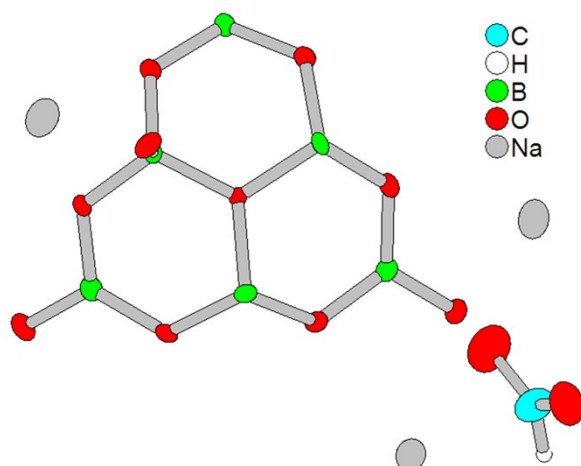

**Figure S3.** The asymmetric unit of **1**.

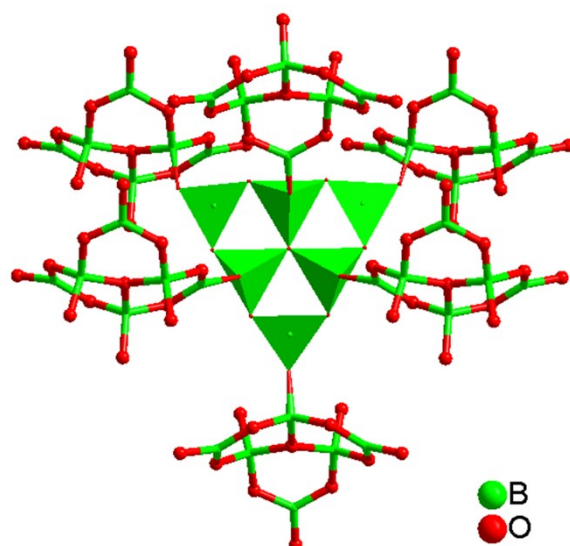

**Figure S4.** View of the linkage of the  $(B_6O_{13})^{8-}$  cluster units in **1**.

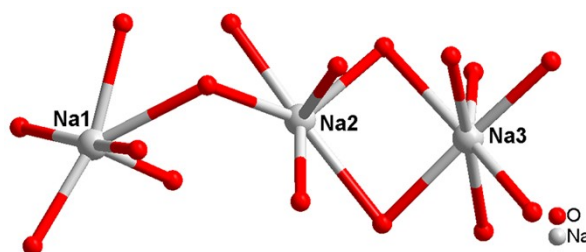

**Figure S5.** The coordination environments of  $Na^+$  ions.

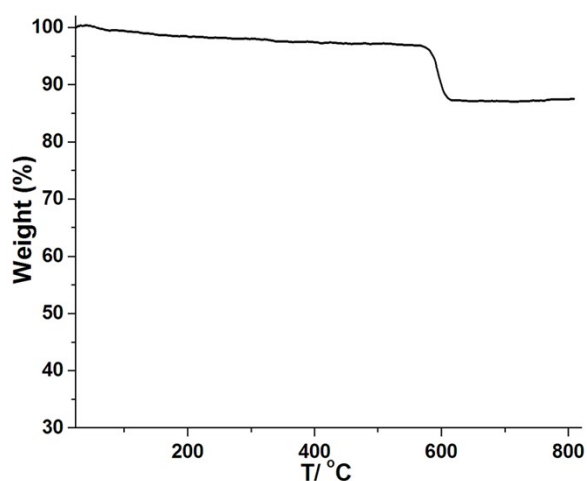

**Figure S6.** TG curve of compound **1** under air atmosphere (10 °C/min).

The curve shows that a gradual weight loss of 12.8% (calcd: 13.3%) was observed in the temperature range 100-610 °C, and assigned to the decomposition of  $HCOO^-$  units.
